# Supplementary material
Source: Springer Nature journal article supplement (https://www.springermedizin.de/resource/supplementary/13256_2013_2643_MOESM2_ESM.pdf/9650174)
Supplement: MOESM2 [file 9650174]

# PATIENT 2

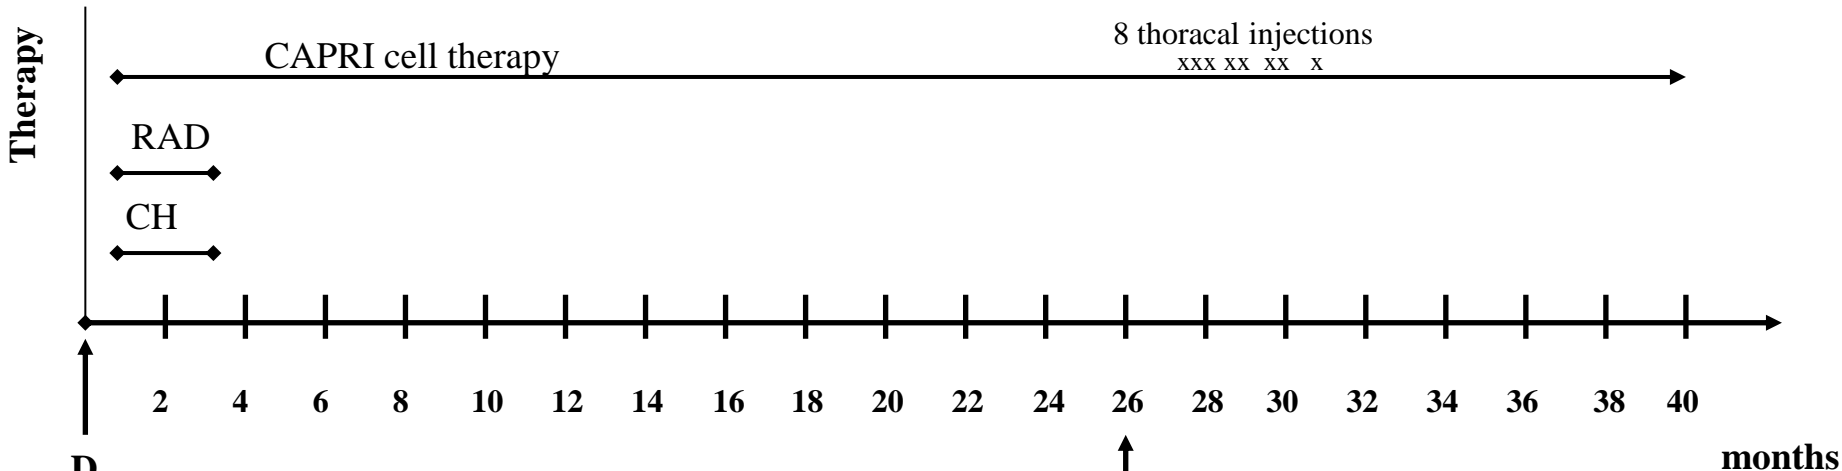

**D**

D = day of diagnosis

CH = chemotherapy: cisplatin, pemetrexed

RAD = radiation: 50Gy, boost 60Gy and 64Gy

PET/CT
